# Supplementary material for: Insertion and deletion polymorphisms of the ancient AluS family in the human genome
Source: PubMed Central journal article supplement (PMC5402677; doi:10.1186/s13100-017-0089-9), 2017-04-24
Supplement: 13100_2017_89_MOESM2_ESM.pdf [file 13100_2017_89_MOESM2_ESM.pdf]

**a**

|         |                                                                            |
|---------|----------------------------------------------------------------------------|
| AluSx   | GGCCGGGCGCGGTGGCTCACGCCTGTAATCCACGCACTTTGGGAGGCCGAGGCGGGCGGATCACCTGAGGTCAG |
| AluSp   | .....G.                                                                    |
| AluSz   | .....                                                                      |
| AluSg   | .....                                                                      |
| AluSq   | .....T.....                                                                |
| AluSc   | .....A                                                                     |
| AluY    | .....                                                                      |
| AluYa5  | .....                                                                      |
| AluYa8  | .....                                                                      |
| AluYb8  | .....T.....T.....                                                          |
| AluYb9  | .....T.....T.....                                                          |
| AluYc1  | .....                                                                      |
| 11q14.1 | ..T.....T.....A.....                                                       |

**b**

|         |                                                                          |
|---------|--------------------------------------------------------------------------|
| AluSx   | GAGTTCGAGACCAGCCTGGCCAAACATGGTGAAACCCGTCCTACTAAAAATACAAAAATTAGCCGGGCGTGG |
| AluSp   | .....A.....A.....                                                        |
| AluSz   | .....                                                                    |
| AluSg   | .....                                                                    |
| AluSq   | .....                                                                    |
| AluSc   | .....T.....                                                              |
| AluY    | .....A.....A.....                                                        |
| AluYa5  | .....T.....C.....T.....A.....C.....A.....A.....                          |
| AluYa8  | .....T.....C.....T.....A.....C.....C.....A.....A.....                    |
| AluYb8  | .....T.....T.....A.....A.....C.....                                      |
| AluYb9  | .....T.....T.....A.....A.....C.....                                      |
| AluYc1  | .....T.....T.....C.....A.....                                            |
| 11q14.1 | .....-.....A.....A.....                                                  |

|         |                                                                            |
|---------|----------------------------------------------------------------------------|
| AluSx   | TGGCGCGCGCCTGTAATCCACGCTACTCGGGAGGCTGAGGCAGGAGAATCGCTTGAACCCGGGAGGCGGAGGTT |
| AluSp   | .....AT.....                                                               |
| AluSz   | .....                                                                      |
| AluSg   | .....                                                                      |
| AluSq   | .....G.....                                                                |
| AluSc   | .....G.....                                                                |
| AluY    | .....G.....G.....G.....G.....C.....                                        |
| AluYa5  | .....G.....G.....T.....G.....G.....C.....                                  |
| AluYa8  | .....G.....G.....T.....T.....G.....G.....C.....                            |
| AluYb8  | .....G.....G.....G.....G.....A.....C.....                                  |
| AluYb9  | .....G.....G.....G.....G.....A.....C.....                                  |
| AluYc1  | .....A.....G.....G.....G.....G.....C.....                                  |
| 11q14.1 | ..T.....G.....G.....A.....A.....                                           |

|         |                                                                      |
|---------|----------------------------------------------------------------------|
| AluSx   | GCAGTGAGCCGAGATCGCGCCACT-----GCACTCCAGCCTGGGCGAC-AGAGCGAGACTCCGTCTCA |
| AluSp   | ..G.....T.....A..A.....A.....                                        |
| AluSz   | .....                                                                |
| AluSg   | .....                                                                |
| AluSq   | .....A..A.....A.....                                                 |
| AluSc   | .....-                                                               |
| AluY    | .....                                                                |
| AluYa5  | .....C.....                                                          |
| AluYa8  | .....C.....                                                          |
| AluYb8  | .....T.....GCAGTCC...G...G.....                                      |
| AluYb9  | .....T.....GCAGTCC...G...G.....                                      |
| AluYc1  | .....                                                                |
| 11q14.1 | .....A..A...T.....A...G.....                                         |
