# Supplementary material for: Insertion and deletion polymorphisms of the ancient AluS family in the human genome
Source: PubMed Central journal article supplement (PMC5402677; doi:10.1186/s13100-017-0089-9), 2017-04-24

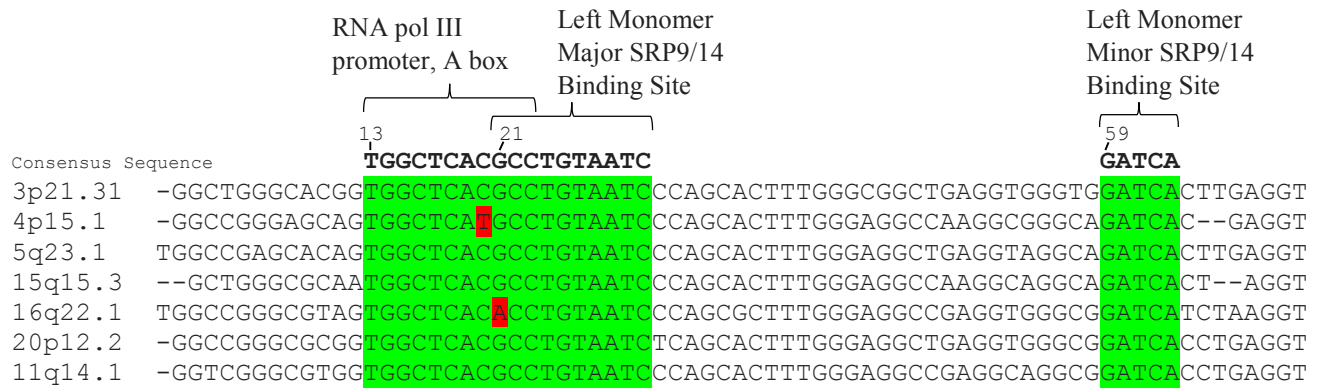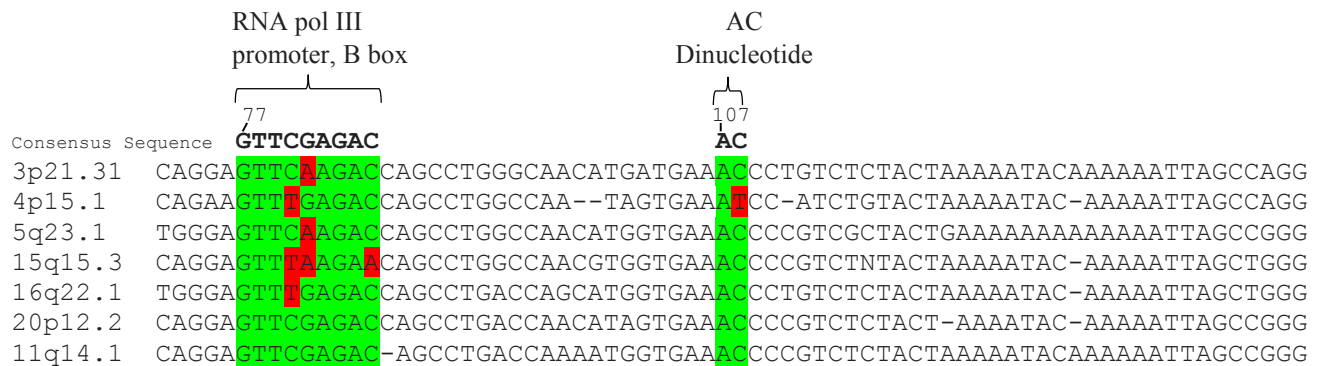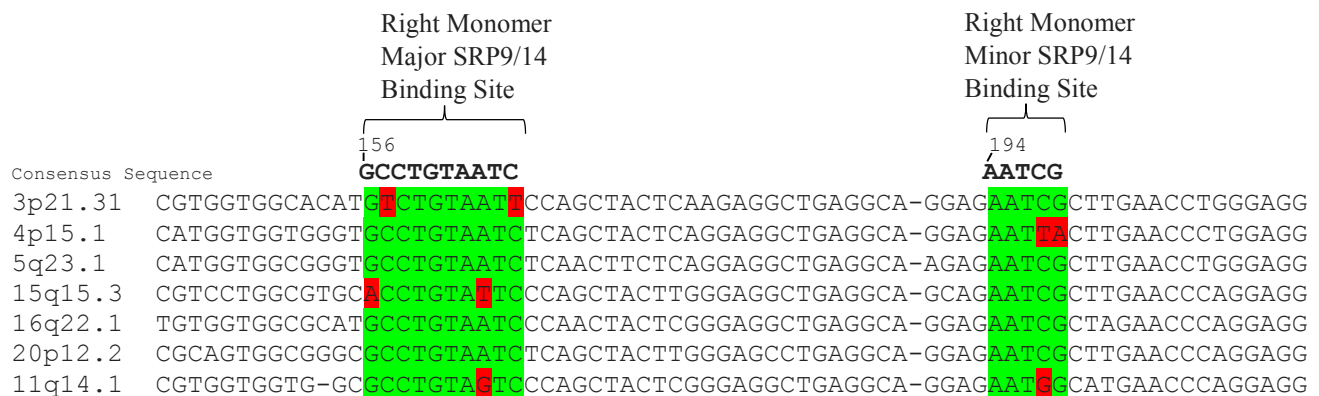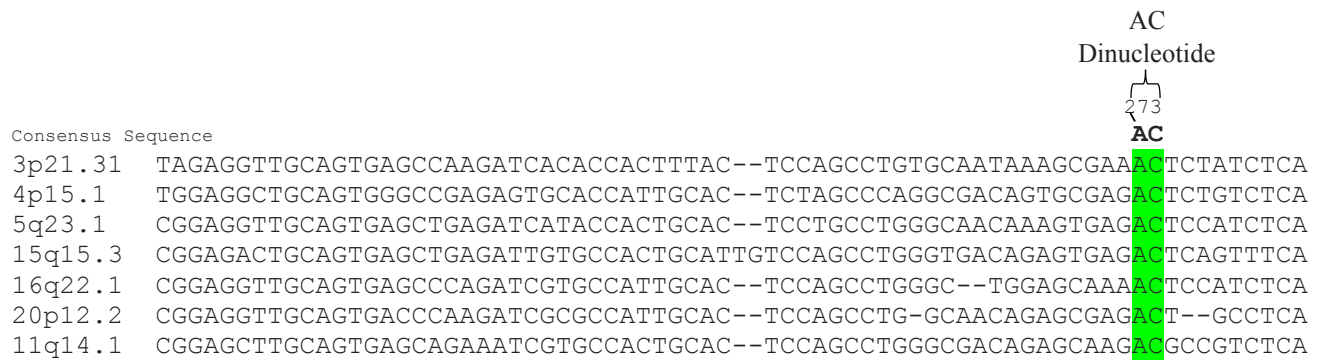

Supplement: 13100_2017_89_MOESM5_ESM.pdf [file 13100_2017_89_MOESM5_ESM.pdf]
